# Supplementary material
Source: PubMed Central journal article supplement (PMC3064007)
Supplement: supp_00389.2010_Suppl_FiglegendE389.pdf [file supp_00389.2010_Suppl_FiglegendE389.pdf]

Supplemental Fig. 1. Optimization of the saponin-permeabilized myofiber preparation for human female subjects. Comparison between the standard saponin concentration (50  $\mu\text{g/ml}$ ) and the saponin concentration used in the current study (30  $\mu\text{g/ml}$ ) to permeabilized vastus lateralis myofibers obtained from women. *A*: representative oxygraphic trace of  $\text{O}_2$  concentration (*top*) in the experimental chamber with vastus lateralis myofibers from an obese woman (i.e., BMI >30) permeabilized with either 50  $\mu\text{g/ml}$  (black trace) or 30  $\mu\text{g/ml}$  (gray trace) and the corresponding respiratory  $\text{O}_2$  flux derivation ( $\text{JO}_2$ ; *bottom*) from the oxygraphic trace. Substrate conditions during  $\text{JO}_2$  measurements were 10 mM glutamate + 2 mM malate (GM); GM + 4 mM ADP (+ADP); GM+ADP + 10  $\mu\text{M}$  cytochrome *c* (+cyt *c*). *B*: data are means  $\pm$  SE from 4 separate myofibers obtained from one obese woman. Percent coefficient of variation (%CV) of the  $\text{JO}_2$  for myofibers permeabilized with 50  $\mu\text{g/ml}$  saponin were 32.7, 32.7, and 20.1% for GM, +ADP, and +cyt *c* conditions, respectively. %CV of the  $\text{JO}_2$  for myofibers permeabilized with 30  $\mu\text{g/ml}$  saponin were 14.8, 7.0, and 7.6% for GM, +ADP, and +cyt *c* conditions, respectively. \* $P < 0.05$  vs. 50  $\mu\text{g/ml}$ ; \*\*\* $P < 0.001$  vs. 50  $\mu\text{g/ml}$ .
