# Supplementary material
Source: PubMed Central journal article supplement (PMC3064007)

# Supplemental Figure 1.

## A.

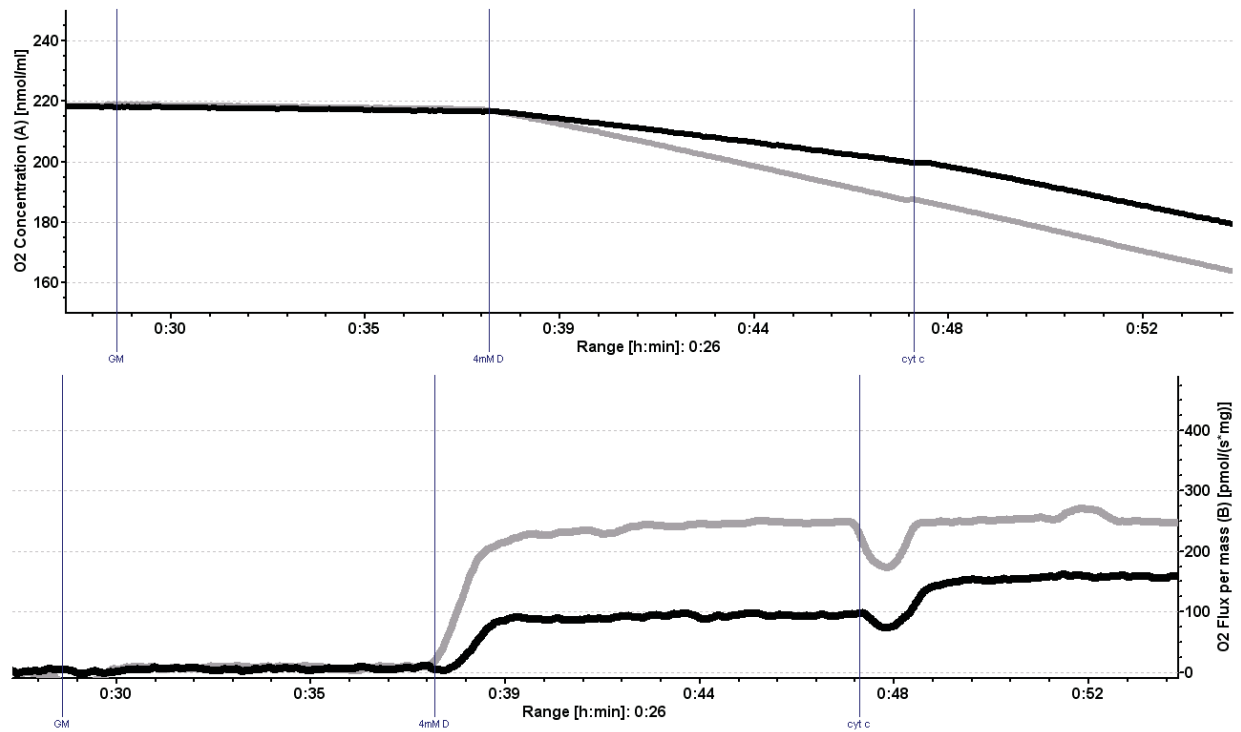

## B.

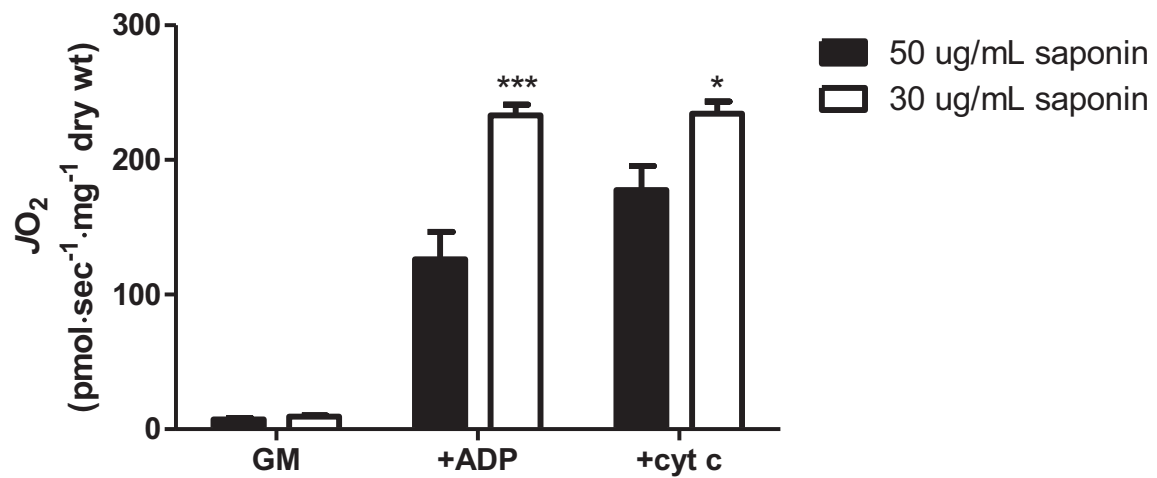

Supplement: supp_00389.2010_figS1.pdf [file supp_00389.2010_figS1.pdf]
